# Supplementary material for: Identification of Two Legionella pneumophila Effectors that Manipulate Host Phospholipids Biosynthesis
Source: PubMed Central journal article supplement (PMC3486869; doi:10.1371/journal.ppat.1002988), 2012-11-01
Supplement: ppat.1002988.s003.pdf [file ppat.1002988.s003.pdf]

Figure S3

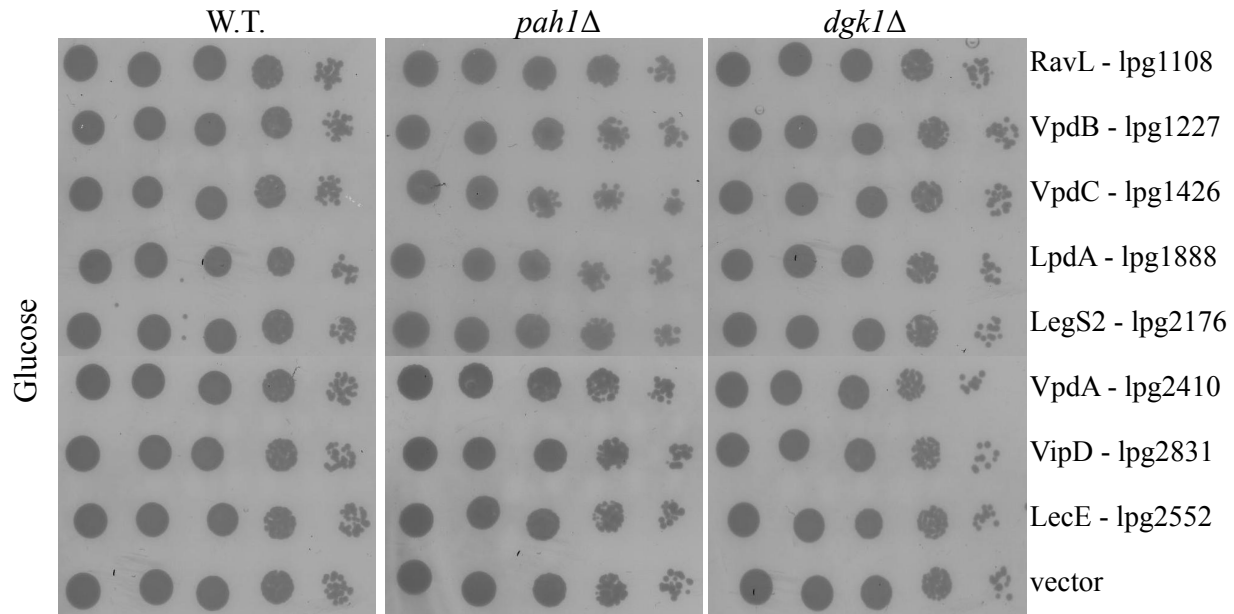

**Figure S3.** The glucose control plates of the screen presented in Fig. 8. *L. pneumophila* effectors (indicated on the right) expected to be involved in or that were shown to function in phospholipids biosynthesis were over-expressed under the GAL1 promoter in wild-type *S. cerevisiae* BY4741 (W.T.), the *pah1* deletion mutant RV-L8-59 (*pah1*Δ) or in the *dgk1* deletion mutant (*dgk1*Δ). LecE was used as a positive control. pGREG523 (vector) was used as a negative control.
