# Supplementary material for: Identification of Two Legionella pneumophila Effectors that Manipulate Host Phospholipids Biosynthesis
Source: PLOS journal article supplement (doi:10.1371/journal.ppat.1002988), 2012-11-01
Supplement: S5 (10.1371/journal.ppat.1002988.s005) [file journal.ppat.1002988.s005]

**Table S2 - Primers used in this study**

| <b>Primer name</b> | <b>Sequence (5'-3')</b>              |
|--------------------|--------------------------------------|
| cya-lpg0581F       | GCACGAATTCAATGAACACAGATGATATAAAATAAA |
| cya-lpg0581R       | GAGCGGATCCTTAAACTCTTCCCAAATTC        |
| cya-lpg1692F       | GAGCGAATTCAATGGCACGCAGCAAAGAAGA      |
| cya-lpg1692R       | GAGCGGATCCCTAACTCGGACCCTCGTACGTAA    |
| cya-lpg1717F       | GAGCGAGCTCAATGCCAGTTCGTTATTCAGG      |
| cya-lpg1717R       | GACGGTCGACTTAAATGGCCAATGCAGTAGAA     |
| cya-lpg1887F       | GAGCGAATTCAATGAAAAAAGTGATATTGTATGC   |
| cya-lpg1887R       | GAGCGGATCCTATTGGTTAGCCTTTTGCAAT      |
| cya-lpg2164F       | AGCGAATTCAATGTATTTTTCAAGATGTATTCAC   |
| cya-lpg2164R       | GAGCGGATCCGTCACCTATTCTGCGCTTG        |
| cya-lpg2546F       | GACAGAGCTCAATGAGCATAACAGTTAAATCCT    |
| cya-lpg2546R       | GAGCGGATCCTTATAAGTTTAGAGTCTTGAAAC    |
| cya-lpg2552F       | AGCGAATTCAATGAAAGAAATAGTTAGTTATTAG   |
| cya-lpg2552R       | GAGTGGATCCGGTTGCTTTAAAAACCTCAT       |
| lpg2552-C-ter-92F  | GAGCGAATTCAACCTGGCCACCGTTTTTGA       |
| lpg1888F           | GAGCGAATTCAATGCTCCAATTTTTTGAGAAAAG   |
| lpg1888R           | GAGCGTCGACAGCCTAAAAATCAAGAACAAC      |
| lpg1888-K165R-F    | GTCCAACCATAATAGAGCCATCTGGATTGATGGGG  |
| lpg1888-K165R-R    | ATCCAGATGGCTCTATTATGGTTGGACGCAATGGA  |
| lpg1888-K376R-F    | GGTATTTCATATGAGATTTATGTCAATTGATGGGC  |
| lpg1888-K376R-R    | GACATAAATCTCATATGAATAACCTCTTTTTCAT   |
| ylfA-cyaA-EcoRI    | GAGCGAATTTCGATGGCTACTAATGAAACAGAGC   |
| ylfA-cyaA-PstI     | GACGCTGCAGCCTTAAATCCTTCTCTTAATTGAC   |
| lpg1108F           | GAGCGAATTCAATGTTGAAGCGCGTTCTTAATAC   |
| lpg1108R           | GAGAGTCGACGTTTATGGATTGAAAAGG         |
| lpg1227F           | AGCGAATTCAATGAAAACGGTAAATAGTCAAAATG  |
| lpg1227R           | GAGCGTCGACTTTTACGCCCTATATAGGGATG     |
| lpg2410F           | GAGCGGATCCAATGAAAACAAAGCAAGAAGTTTC   |
| lpg2410R           | GAGAGTCGACGCTTTGGATTTAAACCTG         |
| Lpg1426-EcoRI      | GAGAGAATTTCGATGACCCACAGCAGCTC        |
| Lpg1426-BamHI      | GACCGGATCCATGTGATGCAAACTCATACG       |
| VipD-F             | GAGCGGATCCAATGACAAAAAGCCGTAATTA      |
| VipD-R             | GAGAGTCGACGAAAAATGTTCCGGAATTATTC     |
| 2552-up-BamHI      | GACAGGATCCGGACAATGTAAATAAACAATAAG    |
| 2552-up-SalI       | GACAGTCGACTATTTCTTTCATTACAATAAATCCT  |
| 2552-dw-SalI       | GACAGTCGACCATAAGTGATGAGGTTTTTAAAGC   |
| 2552-dw-EcoRI      | GACAGAATTCCAAGCATCAAGTTCATTTTTTC     |
| 1888-Up-BamHI      | CGTCGGATCCCCGGGCGAACTGCAGTCACTGTC    |
| 1888-up-EcoRV      | GACAGATATCAAAAAATGGAGCATGATTC        |
| 1888-DW- EcoRV     | GACAGATATCTGTTTGTGTTGTTCTTGATTTTAG   |
| 1888-DW- EcoRI     | GACAGAATTCGCGGAAAATGTAGCATATCAATGC   |
| DGK1-SpeI          | GAGCACTAGTATGGGGACCGAAGATGCCA        |
| DGK1-SalI          | GAGCGTCGACATGCTTTTATTTCTTGAATGTTTTG  |
| DGK-R76A-F         | CATGAAATTCGCGCTAAGGTGTTCCATTCTTCCAT  |
| DGK-R76A-R         | CACCTTAGCGGGAATTTTCATGTTTAGTTATAAAAT |
| DGK-D177A-F        | CTAAGTTGGTCCGCTACAGCCGCCGCAACTATTG   |
| DGK-D177A-R        | GCGGCTGTAGCGGACCAACTTAGCAAAAATAACG   |
| Cdc28-SpeI         | GAGCACTAGTATGAGCGGTGAATTAGCAAATTAC   |
| Cdc28-SalI         | GAGCGTCGACTTATGATCTTGGAAAGTAGGGGTG   |
| NEM1-SpeI          | GTGCACTAGTATGAATGCCCTAAAATATTTCTC    |
| NEM1-SalI          | GAGCGTCGACAATTGTCAGTTTATGTTGAATG     |
| SPO7-SpeI          | GTGCACTAGTATGGAGCCAGAGCATAGG         |
| SPO7-SalI          | GAGCGTCGACTCTTTCATTCTGATTTAGGTGCG    |

|                |                                                                      |
|----------------|----------------------------------------------------------------------|
| Pah1-for       | GCTCCAGCTGCTCTCTTCGTTCCGAGTTCC                                       |
| Pah1-rev       | GTTATCTAGAATCTTCGAATTCATCTTCGTC                                      |
| Pah1-D398E-for | GTTATCAGTGAAATTGATGGCACCATCACAAAATC                                  |
| Pah1-D398E-rev | GCCATCAATTTCACTGATAACAATTGGAACATCCC                                  |
| HA-For         | GCTATCTAGAGGAATCTTTTACCCATACGATGT                                    |
| HA-Rev         | GTCGTCGACCTAGCACTGAGCAGCGTAATCTG                                     |
| Pah1-kanMX-for | ATGCAGTACGTAGGCAGAGCTCTTGGGTCTGTGTCTAAAACATGGTCTTCATCGATGAATTCGAGCTC |
| Pah1-kanMX-rev | TTAATCTTCGAATTCATCTTCGTCGAATTCATCGTCATCGAATTCATCGCGTACGCTGCAGGTCGAC  |
| NEM1-kanMX-for | ATGAATGCCCTAAAATATTTCTCAAATCATTTAATAACTACAAAGAAACAATCGATGAATTCGAGCTC |
| NEM1-kanMX-rev | TCAGTTTATGTTGAATGCCTTCTCTCCATGTTTCAATGCCAGTATATTCCGTACGCTGCAGGTCGAC  |
| Myc-F-NdeI     | GACACATATGATCCCCGGGTTAATTAACGG                                       |
| Myc-R-yeast    | AGGACCGTGCAGCGGATCCA                                                 |
| Pho85-Sall-for | GAGCGTCGACAATGTCTTCTTCTTCACAGTATG                                    |
| Pho85-Sall-rev | GAGCGTCGACGGGCTGCGTTATGAAGC                                          |
| Pho80-SpeI     | GTGCACTAGTATGGAAAGCACATCAGGAGAAC                                     |
| Pho80-Sall     | GAGCGTCGACGAAAAATCATTAAATCTGGCTTTG                                   |
