# Supplementary material for: Identification of Two Legionella pneumophila Effectors that Manipulate Host Phospholipids Biosynthesis
Source: PLoS Pathog. 2012 Nov 1;8(11):e1002988. doi: 10.1371/journal.ppat.1002988 (PMC3486869; doi:10.1371/journal.ppat.1002988)
Supplement: Table S1 — Plasmids used in this study. (PDF) [file ppat.1002988.s004.pdf]

**Table S1 - Plasmids used in this study**

| Name                   | Features                                                                                | Reference or Source |
|------------------------|-----------------------------------------------------------------------------------------|---------------------|
| pRV-lpg0581            | Full length lpg0581 cloned in pUC-18                                                    | This study          |
| pRV-lpg1692            | Full length lpg1692 cloned in pUC-18                                                    | This study          |
| pRV-lpg1717            | Full length lpg1717 cloned in pUC-18                                                    | This study          |
| pRV-lpg1887            | Full length lpg1887 cloned in pUC-18                                                    | This study          |
| pRV-lpg2164            | Full length lpg2164 cloned in pUC-18                                                    | This study          |
| pRV-lpg2546            | Full length lpg2546 cloned in pUC-18                                                    | This study          |
| pRV-lpg2552            | Full length lpg2552 cloned in pUC-18                                                    | This study          |
| pRV-lpg2552-C-ter      | C-terminal 92aa of lpg2552 cloned in pUC-18                                             | This study          |
| pRV-lpg1888            | Full length lpg1888 cloned in pUC-18                                                    | This study          |
| pRV-YlfA               | Full length <i>L. pneumophila ylfA</i> cloned in pUC-18                                 | This study          |
| pRV-lpg1888-K165R      | lpg1888-K165R point mutant cloned in pUC-18                                             | This study          |
| pRV-lpg1888-K376R      | lpg1888-K376R point mutant cloned in pUC-18                                             | This study          |
| pRV-VipD               | Full length <i>L. pneumophila vipD</i> cloned in pUC-18                                 | This study          |
| pRV-VpdA               | Full length <i>L. pneumophila vpdA</i> cloned in pUC-18                                 | This study          |
| pRV-VpdB               | Full length <i>L. pneumophila vpdB</i> cloned in pUC-18                                 | This study          |
| pRV-VpdC               | Full length <i>L. pneumophila vpdC</i> cloned in pUC-18                                 | This study          |
| pRV-lpg1108            | Full length lpg1108 cloned in pUC-18                                                    | This study          |
| pRV-cyaA-lpg0581       | lpg0581 fused to CyaA in pMMB-cyaA-C                                                    | This study          |
| pRV-cyaA-lpg1692       | lpg1692 fused to CyaA in pMMB-cyaA-C                                                    | This study          |
| pRV-cyaA-lpg1717       | lpg1717 fused to CyaA in pMMB-cyaA-C                                                    | This study          |
| pRV-cyaA-lpg1887       | lpg1887 fused to CyaA in pMMB-cyaA-C                                                    | This study          |
| pRV-cyaA-lpg2164       | lpg2164 fused to CyaA in pMMB-cyaA-C                                                    | This study          |
| pRV-cyaA-lpg2546       | lpg2546 fused to CyaA in pMMB-cyaA-C                                                    | This study          |
| pRV-cyaA-lpg2552       | lpg2552 fused to CyaA in pMMB-cyaA-C                                                    | This study          |
| pRV-cyaA-lpg2552-C-ter | C-terminal 92aa of lpg2552 fused to CyaA in pMMB-cyaA-C                                 | This study          |
| pRV-cyaA-lpg1888       | lpg1888 fused to CyaA in pMMB-cyaA-C                                                    | This study          |
| pRam-lpg1692           | lpg1692 fused to 13x <i>myc</i> in pRam                                                 | This study          |
| pRam-lpg1717           | lpg1717 fused to 13x <i>myc</i> in pRam                                                 | This study          |
| pRam-lpg2164           | lpg2164 fused to 13x <i>myc</i> in pRam                                                 | This study          |
| pRam-lpg2546           | lpg2546 fused to 13x <i>myc</i> in pRam                                                 | This study          |
| pRam-lpg2552           | lpg2552 fused to 13x <i>myc</i> in pRam                                                 | This study          |
| pRam-YlfA              | <i>L. pneumophila ylfA</i> fused to 13x <i>myc</i> in pRam                              | This study          |
| pRam-lpg1888           | lpg1888 fused to 13x <i>myc</i> in pRam                                                 | This study          |
| pRam-lpg1888-K165R     | lpg1888-K165R point mutant fused to 13x <i>myc</i> in pRam                              | This study          |
| pRam-lpg1888-K376R     | lpg1888-K376R point mutant fused to 13x <i>myc</i> in pRam                              | This study          |
| pRam-VipD              | <i>L. pneumophila vipD</i> fused to 13x <i>myc</i> in pRam                              | This study          |
| pRam-VpdA              | <i>L. pneumophila vpdA</i> fused to 13x <i>myc</i> in pRam                              | This study          |
| pRam-VpdB              | <i>L. pneumophila vpdB</i> fused to 13x <i>myc</i> in pRam                              | This study          |
| pRam-VpdC              | <i>L. pneumophila vpdC</i> fused to 13x <i>myc</i> in pRam                              | This study          |
| pRam-lpg1108           | lpg1108 fused to 13x <i>myc</i> in pRam                                                 | This study          |
| pED-ySPL               | <i>L. pneumophila LegS2</i> fused to 13x <i>myc</i> in pRam                             | [1]                 |
| pRV-lpg2552-UP         | 1-kb upstream to the lpg2552 gene in pUC18                                              | This study          |
| pRV-lpg2552-DW         | 1-kb downstream to the lpg2552 gene in pUC18                                            | This study          |
| pRV-lpg2552-KM         | The lpg1888 upstream and downstream regions with the Km cassette between them in pUC-18 | This study          |
| pRV-lpg2552::KM-del    | The insert of pRV-2552-KM in pLAW344                                                    | This study          |
| pRV-lpg1888-UP         | 1-kb upstream to the lpg1888 gene in pUC18                                              | This study          |
| pRV-lpg1888-DW         | 1-kb downstream to the lpg1888 gene in pUC18                                            | This study          |
| pRV-lpg1888-GM         | The lpg1888 upstream and downstream regions with the Gm cassette between them in pUC-18 | This study          |
| pRV-lpg1888::GM-del    | The insert of pRV-1888-GM in pLAW344                                                    | This study          |
| pGREG536-1888          | Lpg1888 fused to 7xHA in pGREG536                                                       | This study          |
| pGREG536-1888-K165R    | Lpg1888-K165R mutant fused to 7xHA in pGREG536                                          | This study          |
| pGREG536-1888-K376R    | Lpg1888-K376R mutant fused to 7xHA in pGREG536                                          | This study          |
| pGREG506-Dgk1          | <i>S. cerevisiae dgk1</i> in pGREG506                                                   | This study          |
| pGREG506-Dgk1-R76A     | <i>S. cerevisiae dgk1</i> -R76A mutant in pGREG506                                      | This study          |

|                             |                                                                                                                            |            |
|-----------------------------|----------------------------------------------------------------------------------------------------------------------------|------------|
| pGREG506-Dgk1-D177A         | <i>S. cerevisiae dgk1</i> -D177A mutant in pGREG506                                                                        | This study |
| pSup-13                     | <i>S. cerevisiae dgk1, rpl20B, sps4, sfg1, cot1, faa1</i> -partial gene in pYep24                                          | This study |
| pSup-13-sub-clone 1         | <i>S. cerevisiae dgk1, rpl20B, sps4</i> , in pYep24                                                                        | This study |
| pSup-13-sub-clone 2         | <i>S. cerevisiae dgk1, rpl20B, faa1</i> -partial gene in pYep24                                                            | This study |
| pSup-13-sub-clone 3         | <i>S. cerevisiae, sps4</i> , in pYep24                                                                                     | This study |
| pGREG503-Spo7               | <i>S. cerevisiae spo7</i> in pGREG523                                                                                      | This study |
| pGREG505-Spo7               | <i>S. cerevisiae spo7</i> in pGREG505                                                                                      | This study |
| pGREG506-Nem1               | <i>S. cerevisiae nem1</i> in pGREG506                                                                                      | This study |
| pGREG505-Nem1               | <i>S. cerevisiae nem1</i> in pGREG505                                                                                      | This study |
| pGREG506-Pho85              | <i>S. cerevisiae pho85</i> in pGREG506                                                                                     | This study |
| pGREG504-Pho80              | <i>S. cerevisiae pho80</i> in pGREG504                                                                                     | This study |
| pGREG505-Pho80              | <i>S. cerevisiae pho80</i> in pGREG505                                                                                     | This study |
| pGREG505-Pah1-3xHA          | C-terminal fusion of 3xHA with <i>S. cerevisiae pah1</i> under its native promoter in promoter-less pGREG505               | This study |
| pGREG505-Pah1-D398E-3xHA    | C-terminal fusion of 3xHA with <i>S. cerevisiae pah1</i> -D398E mutant under its native promoter in promoter-less pGREG505 | This study |
| pRV-13x <i>myc</i> -lpg2552 | lpg2552 fused to N-terminal 13x <i>myc</i> in pMMB-13x <i>myc</i>                                                          | This study |
| pRV-13x <i>myc</i> -lpg1888 | lpg1888 fused to N-terminal 13x <i>myc</i> in pMMB-13x <i>myc</i>                                                          | This study |
| pUC-18                      | oriR(colE1) MCS Amp                                                                                                        | [2]        |
| pLAW344                     | oriR(colE1) sacB oriT(RK2) Cm Amp                                                                                          | [3]        |
| pMMB-cyaA-C                 | cyaA cloning vector for C-terminal fusions                                                                                 | [4]        |
| pMMB207-NdeI                | pMMB207 with an NdeI site between the <i>pTac</i> and EcoRI                                                                | [4]        |
| pMMB-13x <i>myc</i>         | pMMB207-NdeI containing the pUC18 polylinker "in-frame" with the 13x <i>myc</i> tag                                        | This study |
| pGREG523                    | <i>CEN/HIS3/pGAL1/13x myc</i> cloning vector for C-terminal fusions                                                        | [5]        |
| pGERG536                    | <i>CEN/URA3/pGAL1/7xHA</i> cloning vector for C-terminal fusions                                                           | [5]        |
| pGERG503                    | <i>CEN/HIS3/ pGAL1</i> cloning vector                                                                                      | [5]        |
| pGERG504                    | <i>CEN/TRP1/ pGAL1</i> cloning vector                                                                                      | [5]        |
| pGERG505                    | <i>CEN/LEU2/ pGAL1</i> cloning vector                                                                                      | [5]        |
| pGERG506                    | <i>CEN/URA3/pGAL1</i> cloning vector                                                                                       | [5]        |
| pYep24                      | <i>2μ/URA3</i> cloning vector in which the yeast genomic library is cloned                                                 | [6]        |
| pRam                        | pGREG523 containing the pUC18 polylinker "in-frame" with the 13x <i>myc</i> tag                                            | This study |
| pRV-mCherry-lpg2552         | Lpg2552 fused to mCherry in pmCherryC1                                                                                     | This study |
| pRV-mCherry-lpg1888         | Lpg1888 fused to mCherry in pmCherryC1                                                                                     | This study |
| pRV-mCherry-lpg1888-K165R   | Lpg1888-K165R mutant fused to mCherry in pmCherryC1                                                                        | This study |
| pEGFP-Spo20-51-91           | <i>S. cerevisiae spo20-51-91</i> fused to GFP in pEGFP-C1                                                                  | [7]        |
| pEGFP-C1-PKCα               | C1 domain of PKCα fused to GFP in pEGFP-C2                                                                                 | [8]        |
| pGFP-KDEL                   | KDEL receptor fused to GFP                                                                                                 | [9]        |

## References

1. Degtyar E, Zusman T, Ehrlich M, Segal G (2009) A *Legionella* effector acquired from protozoa is involved in sphingolipids metabolism and is targeted to the host cell mitochondria. *Cell Microbiol* 11: 1219-1135.
2. Yanish-Perron, C., J. Viera, and J. Messing (1985) Improved M13 phage cloning vectors and host strains: nucleotide sequences of the M13mp18 and pUC19 vectors. *Gene* 33:103-119.
3. Wiater, L. A., A. B. Sadosky, and H. A. Shuman (1994) Mutagenesis of *Legionella pneumophila* using Tn903dIII/acZ: identification of a growth phase-regulated pigmentation gene. *Mol. Microbiol.* 11:641-653.
4. Zusman T, Aloni G, Halperin E, Kotzer H, Degtyar E, et al. (2007) The response regulator PmrA is a major regulator of the *icm/dot* type IV secretion system in *Legionella pneumophila* and *Coxiella burnetii*. *Mol Microbiol* 63: 1508-1523.
5. Jansen G, Wu C, Schade B, Thomas DY, Whiteway M (2005) Drag&Drop cloning in yeast. *Gene* 344: 43-51.
6. Carlson M, Botstein D (1982) Two differentially regulated mRNAs with different 5' ends encode secreted with intracellular forms of yeast invertase. *Cell* 28: 145-154.
7. Kind gift from Prof. U. Ashery, Department of Neurobiology, Tel-Aviv University
8. Kind gift from Prof. M.G Kazanietz, School of Medicine, University of Pennsylvania
9. Kind gift from Prof. G.Z Lederkremer, Department of Cell Research and Immunology Tel-Aviv University
